# Supplementary material for: Chemoselective Polymerization Control: From Mixed-Monomer Feedstock to Copolymers
Source: PubMed Central journal article supplement (PMC4232277; doi:10.1002/anie.201309575), 2014-01-22
Supplement: anie0053-1607-sd1.pdf [file anie0053-1607-sd1.pdf]

Supporting Information

© Wiley-VCH 2014

69451 Weinheim, Germany

**Chemoselective Polymerization Control: From Mixed-Monomer Feedstock to Copolymers\*\***

*Dr Charles Romain and Charlotte K. Williams\**

anie\_201309575\_sm\_miscellaneous\_information.pdf

## **Supporting information for**

Pages S1-3: Experimental Section

Page S4: Table S1

Page S5: Table S2

Page S6: Fig. S1

Pages S7: Fig. S2, S3

Page S8: Fig. S4, S5

Page S9: Fig. S6, S7

Page S10: Fig. S8

Page S11: Fig. S9

## Experimental Section

### General procedures

The catalyst [LZn<sub>2</sub>(OAc)<sub>2</sub>] (**1**) and [(BDI)Zn(OAc)] were synthesized employing the previously published methods.<sup>1</sup> All solvents and reagents were purchased from commercial sources (Aldrich and Merck) and used as received, unless stated otherwise. Toluene was distilled from sodium and stored under nitrogen.  $\epsilon$ -caprolactone ( $\epsilon$ -CL) was dried over calcium hydride and store under nitrogen. Cyclohexene oxide was fractionally distilled, over calcium hydride, prior to use and stored under nitrogen. Research grade CO<sub>2</sub> for copolymerization reactions was purchased from BOC (Linde Gas). <sup>1</sup>H and <sup>13</sup>C NMR spectra were measured in CDCl<sub>3</sub> on a Bruker AV-400 spectrometer. *In situ* ATR-FTIR measurements were performed on a Mettler-Toledo ReactIR 4000 spectrometer equipped with a MCT detector and a silver halide DiComp probe. Size exclusion chromatography (SEC) data were collected using a Polymer Laboratories PL GPC-50 instrument (Polymer Laboratories Mixed D columns) with THF as the eluent, at a flow rate of 1 mL min<sup>-1</sup> at 40°C and narrow *M<sub>w</sub>* polystyrene standards for calibration.

### Synthesis of PCL, in the presence of 10 mol. % of CHO (Table 1, Entry 2)

Cyclohexene oxide (25  $\mu$ L, 0.25 mmol), caprolactone (277  $\mu$ L, 2.5 mmol), **1** (10 mg, 12.5  $\mu$ mol) and toluene (2.5 mL) were added to a screw cap vial in the glovebox. The vessel was heated at 353 K, with constant stirring, for 2 h. A sample of the crude product was analyzed by <sup>1</sup>H NMR spectroscopy, to determine the conversion. The volatile components were removed, *in vacuo*, to yield the product as a white powder. *M<sub>n</sub>* = 21,040 g/mol, PDI = 1.41

### Synthesis of PCL with CHO as solvent (Table 1, Entry 3)

Cyclohexene oxide (1.1  $\mu$ L, 0.11 mmol), caprolactone (139  $\mu$ L, 1.25 mmol), **1** (10 mg, 12.5  $\mu$ mol) were added to a Schlenk tube. The vessel was heated at 353 K, with constant stirring, for 2 h. A sample of the crude product was analyzed by <sup>1</sup>H NMR spectroscopy to determine the conversion and selectivity. Unreacted reagents (CHO and  $\epsilon$ -CL) were subsequently removed, *in vacuo*, to yield the product as a white powder. *M<sub>n</sub>* = 6,020 g/mol, PDI = 1.24

### Synthesis of PCHC, in the presence of CL (Table 1, Entry 4):

Cyclohexene oxide (1.1 mL, 10.75 mmol), caprolactone (138.6  $\mu$ L, 1.2 mmol) and **1** (10 mg, 12.5  $\mu$ mol) were added to a Schlenk tube. The vessel was de-gassed, then 1 bar of CO<sub>2</sub> was added and the solution allowed to stir for 30 min at 298 K. The vessel was then heated at 353 K, under a constant pressure of CO<sub>2</sub> at 1 bar, for 15 h. The crude reaction mixture was analysed using <sup>1</sup>H NMR spectroscopy to determine the conversion and selectivity. Then, the unreacted monomers were removed *in vacuo* to yield the polymer product. *M<sub>n</sub>* = 1,040 g/mol, PDI = 1.08

### Synthesis of poly(caprolactone-co-cyclohexylenecarbonate) (Table 1, Entry 5)

Cyclohexene oxide (2.2 mL, 21.5 mmol),  $\epsilon$ -caprolactone (277  $\mu$ L, 2.5 mmol) and **1** (20 mg, 25.0  $\mu$ mol) were added to a Schlenk tube. The vessel was heated at 353 K, under N<sub>2</sub>, for 1 h, then de-gassed and 1 bar of CO<sub>2</sub> was added. The vessel was

heated for 20 h. A sample of the crude product was analysed by  $^1\text{H}$  NMR spectroscopy to determine the conversion and selectivity. Any unreacted monomers were removed, *in vacuo*, to yield the product as a white powder.  $M_n = 4,810$ , PDI = 1.28.

#### **Synthesis of poly(cyclohexylenecarbonate-co-caprolactone) (Table 1, Entry 6)**

Cyclohexene oxide (2.3 mL, 22.5 mmol),  $\epsilon$ -caprolactone (277  $\mu\text{L}$ , 2.5 mmol), and **1** (40 mg, 50.0  $\mu\text{mol}$ ) were added to a Schlenk tube. The vessel was degassed at 298 K, then  $\text{CO}_2$  was added. The vessel was left under a  $\text{CO}_2$  atmosphere, at 298 K, for a few minutes and was then heated to 353 K, with continuous reaction stirring, for 3.5 h. Then, the  $\text{CO}_2$  was removed from the reaction *via* 6 vacuum-nitrogen cycles, over a period of 15 min. The vessel was maintained at 353 K for 3 h. A sample of the crude product was analysed by  $^1\text{H}$  NMR spectroscopy to determine the conversion and selectivity. Any unreacted monomers were removed, *in vacuo*, to yield the product as an oily white wax.  $M_n = 3,490$  g/mol, PDI = 1.48.

#### **Synthesis of poly(cyclohexylenecarbonate-co-caprolactone) (Table 1, Entry 7)**

Cyclohexene oxide (2.3 mL, 22.5 mmol),  $\epsilon$ -caprolactone (277  $\mu\text{L}$ , 2.5 mmol), and **1** (40 mg, 50.0  $\mu\text{mol}$ ) were added to a Schlenk tube. The vessel was degassed at 298 K, then  $\text{CO}_2$  was added. The vessel was left under a  $\text{CO}_2$  atmosphere, at 298 K, for a few minutes and was then heated to 353 K, with continuous reaction stirring, for 4 h. Then, the  $\text{CO}_2$  was removed from the reaction *via* 6 vacuum-nitrogen cycles, over a period of 15 min. The vessel was maintained at 353 K for 2 h. A sample of the crude product was analysed by  $^1\text{H}$  NMR spectroscopy to determine the conversion and selectivity. Any unreacted monomers were removed, *in vacuo*, to yield the product as an oily white wax.  $M_n = 2,349$  g/mol, PDI = 1.49.

**Table S1:** Different conditions for CL ROP using zinc acetate complexes as catalysts. The catalyst structures are illustrated below for reference.

| Entry | Catalyst             | CL (eq.) | <i>i</i> PrOH (eq.) | CHO (eq.) | Solvent              | T (°C) | t (h) | Conv. (%) | $M_{nexp}^a$ (PDI) (g/mol) |
|-------|----------------------|----------|---------------------|-----------|----------------------|--------|-------|-----------|----------------------------|
| 1     | <b>1</b>             | 500      | 4                   | -         | Neat                 | 80     | 3.5   | 0         | -                          |
| 2     | <b>1</b>             | 200      | -                   | 20        | Toluene <sup>b</sup> | 80     | 2     | > 99      | 11,780 (1.4)               |
| 3     | Zn(OAc) <sub>2</sub> | 100      | -                   | 10        | Toluene <sup>c</sup> | 100    | 15    | > 99      | 32,970 (1.82)              |
| 4     | Zn(OAc) <sub>2</sub> | 100      | -                   | 10        | Toluene <sup>c</sup> | 100    | 15    | < 5       | -                          |
| 6     | (BDI)Zn(OAc)         | 100      | -                   | 10        | Toluene <sup>b</sup> | 50     | 1     | 55        | 29,390 (1.32)              |

a) Determined by SEC with polystyrene standards and corrected by 0.56<sup>ii</sup>, b)  $[\varepsilon\text{-CL}]_0 = 1\text{ M}$ ,  
c)  $T = 100\text{ }^\circ\text{C}$  and  $[\varepsilon\text{-CL}]_0 = 8.8\text{ M}$

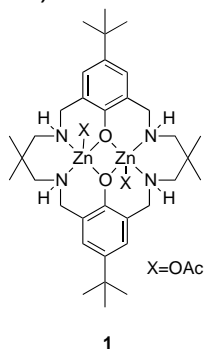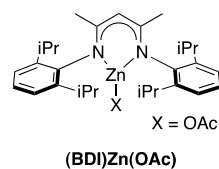

**Table S2:** The formation of polyesters and carbonates: PCHC, PCL and copolymers using catalyst 1.

| Run             | CHO | CL  | CO <sub>2</sub> | t (h) | Polymer  | % Conv. <sup>a)</sup><br>(CL/ CHO) | TON <sup>b)</sup> | TOF <sup>c)</sup><br>(h <sup>-1</sup> ) | M <sub>n</sub> <sup>d)</sup><br>(g/mol) | PDI <sup>d)</sup> |
|-----------------|-----|-----|-----------------|-------|----------|------------------------------------|-------------------|-----------------------------------------|-----------------------------------------|-------------------|
| 1               | -   | 500 | -               | 16    | -        | -                                  | -                 | -                                       | -                                       | -                 |
| 2 <sup>e)</sup> | 20  | 200 | -               | 2     | PCL      | >99                                | 200               | 100                                     | 11780                                   | 1.41              |
| 3               | 900 | 100 | -               | 2     | PCL      | >99                                | 200               | 100                                     | 6020                                    | 1.24              |
| 4               | 900 | 100 | 1               | 15    | PCHC     | 12                                 | 108               | 7                                       | 1040                                    | 1.08              |
| 5 <sup>f)</sup> | 900 | 100 | 1               | 21    | PCL-PCHC | >99 (CL)<br>53 (CHO)               | 577               | 27                                      | 4810                                    | 1.28              |
| 6 <sup>g)</sup> | 450 | 50  | 1               | 6.5   | PCHC-PCL | 6 (CHO);<br>>99 (CL)               | 77                | 12                                      | 3490                                    | 1.48              |
| 7               | 450 | 50  | 1               | 4     | PCHC     | 10 (CHO)                           | 95                | 13                                      | 560                                     | 1.29              |
|                 |     |     |                 | 2     | PCHC-PCL | >99 (CL)                           |                   |                                         | 2350                                    | 1.49              |

a) Determined by <sup>1</sup>H NMR spectroscopy by integrating the normalised resonances for CL (4.23 ppm) and PCL (4.05 ppm) or CHO (3.11 ppm) and PCHC (4.73 - 4.54 ppm). b) Turn-over-number = # moles monomer(s) consumed/# moles catalyst; for copolymers monomer consumption = CL + CHO. c) Turn-over-frequency = TON/time (h). d) Determined by SEC in THF, with a correction factor of 0.56 applied for PCL samples according to the literature findings, e) Polymerization run in toluene, with [CL]<sub>0</sub> = 1M, f) CO<sub>2</sub> added after complete consumption of CL (1 h) as monitored by ATR-IR. g) CO<sub>2</sub> removed after 3.5 h by application of vacuum-nitrogen cycles (6 times).

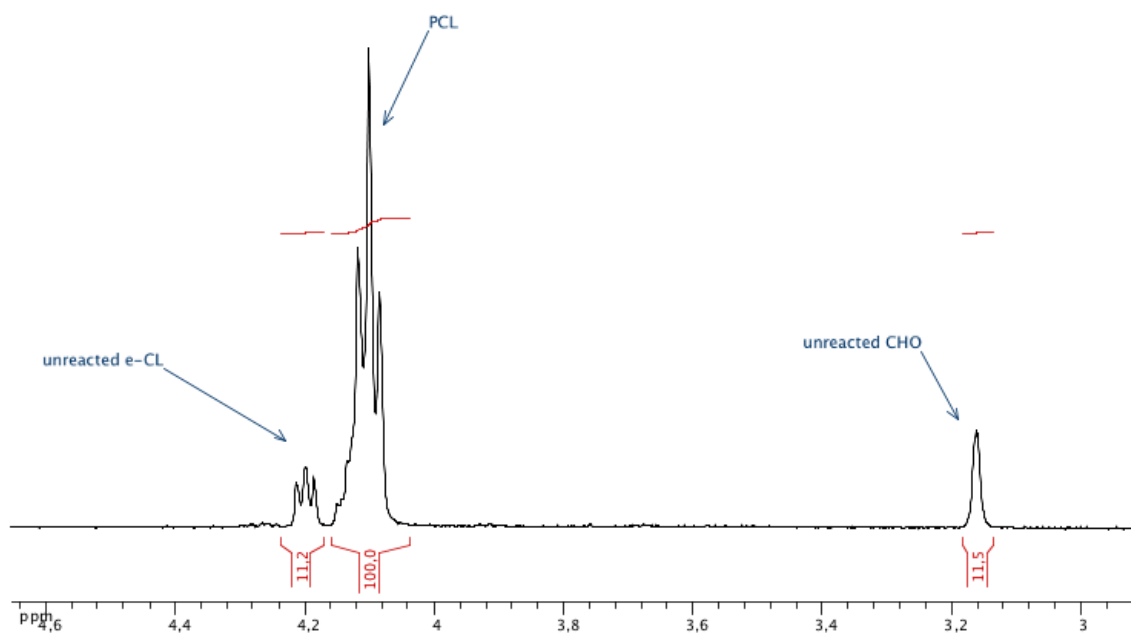

**Figure S1:**  $^1\text{H}$  NMR spectrum ( $\text{CDCl}_3$ , 298 K) showing formation of PCL in the presence of CHO, without polymerization of CHO (absence of (poly)ether linkage at 3.45 ppm). Reaction conditions:  $1/\text{CHO}/\text{CL} = 1/20/200$ , 2 h, 99 % conv. of CL to PCL (Table S1, Entry 2).

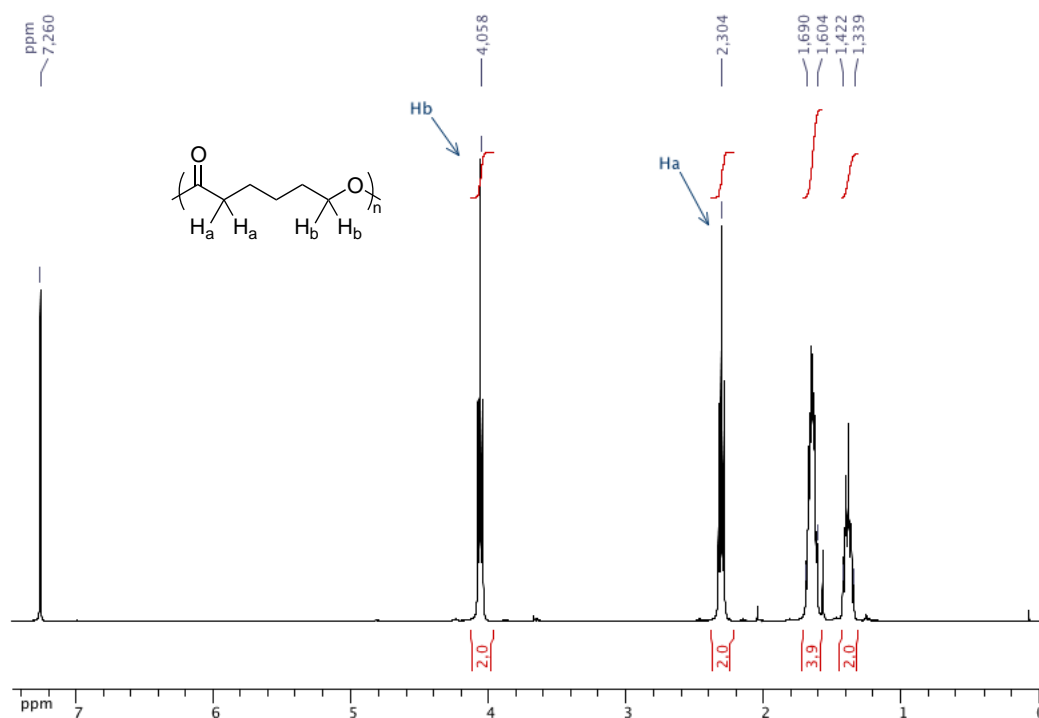

**Figure S2:**  $^1\text{H}$  NMR spectrum ( $\text{CDCl}_3$ , 298 K) of an isolated sample of PCL ( $M_n = 11,780 \text{ g}\cdot\text{mol}^{-1}$ , PDI = 1.41) from conditions described in Figure S1 (Table S1, Entry 2).

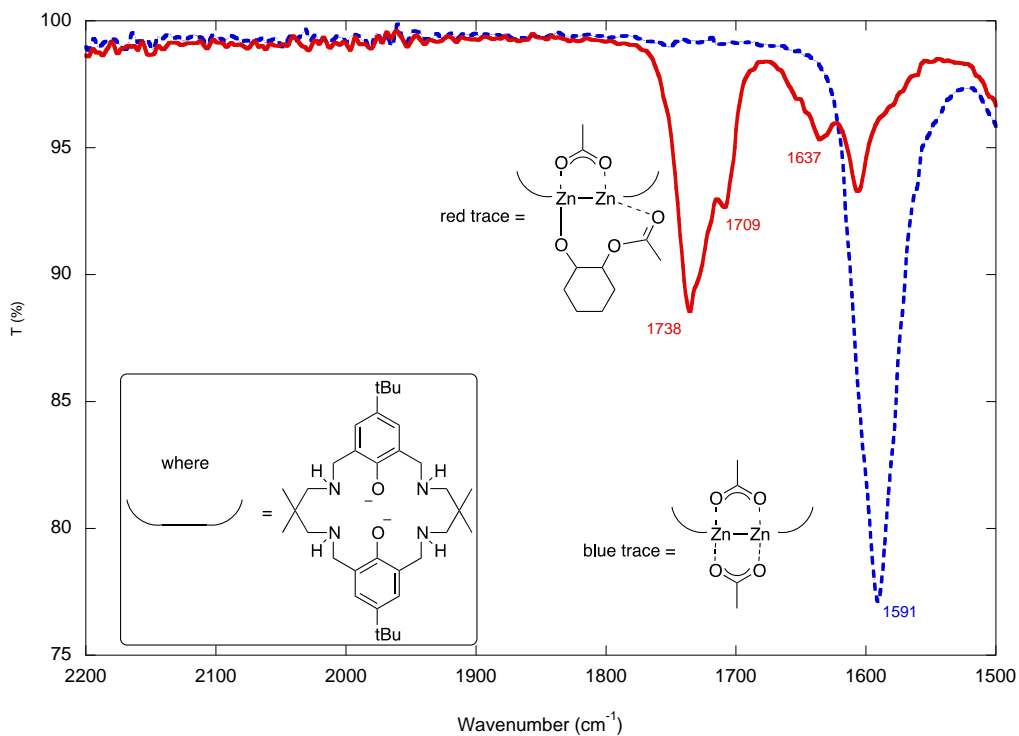

**Figure S3:** IR spectra of complex **1** (blue line) and **1** after heating at 80 °C for 26 h in the presence of 20 equivalents of CHO, in toluene (red line). The experimental spectra show formation of a new absorption at 1738 cm<sup>-1</sup>, assigned to both  $\kappa^2$  and cyclohexene-bound acetate resonance, in line with previous results.<sup>iii</sup>



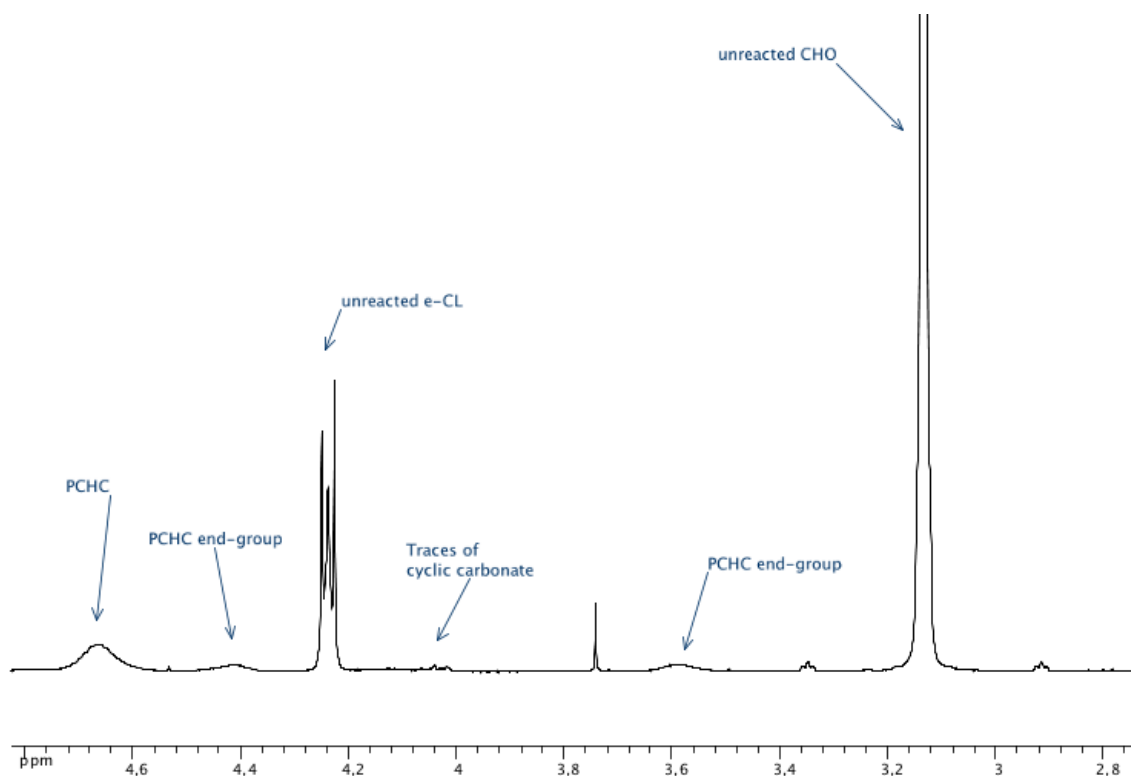

**Figure S4:**  $^1\text{H}$  NMR spectrum ( $\text{CDCl}_3$ , 298 K) showing formation of PCHC in the presence of  $\epsilon$ -CL, with no formation of PCL (4.00 ppm) or ether linkages (3.45 ppm).

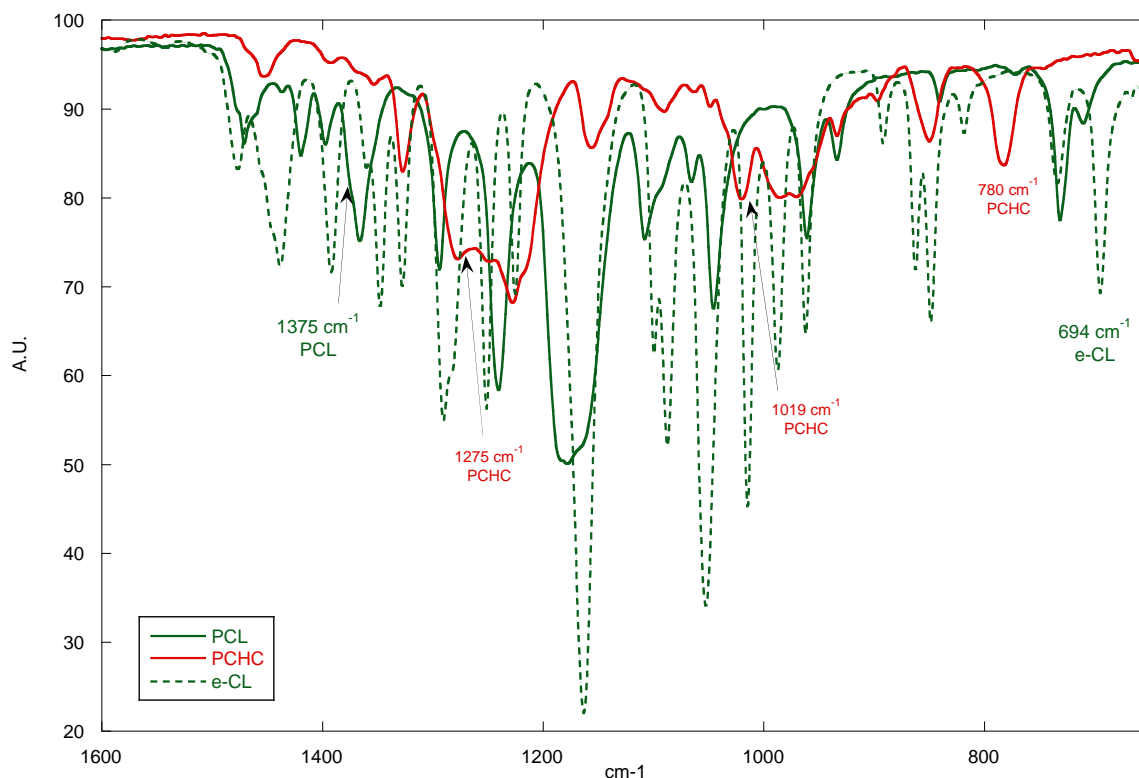

**Figure S5:** Expanded region of the IR spectra of pure samples of PCHC (red line), PCL (green line) and  $\epsilon$ -CL (dashline). The peaks identified represent examples of resonances which can be cleanly assigned to a specific monomer(s) in the mixture.

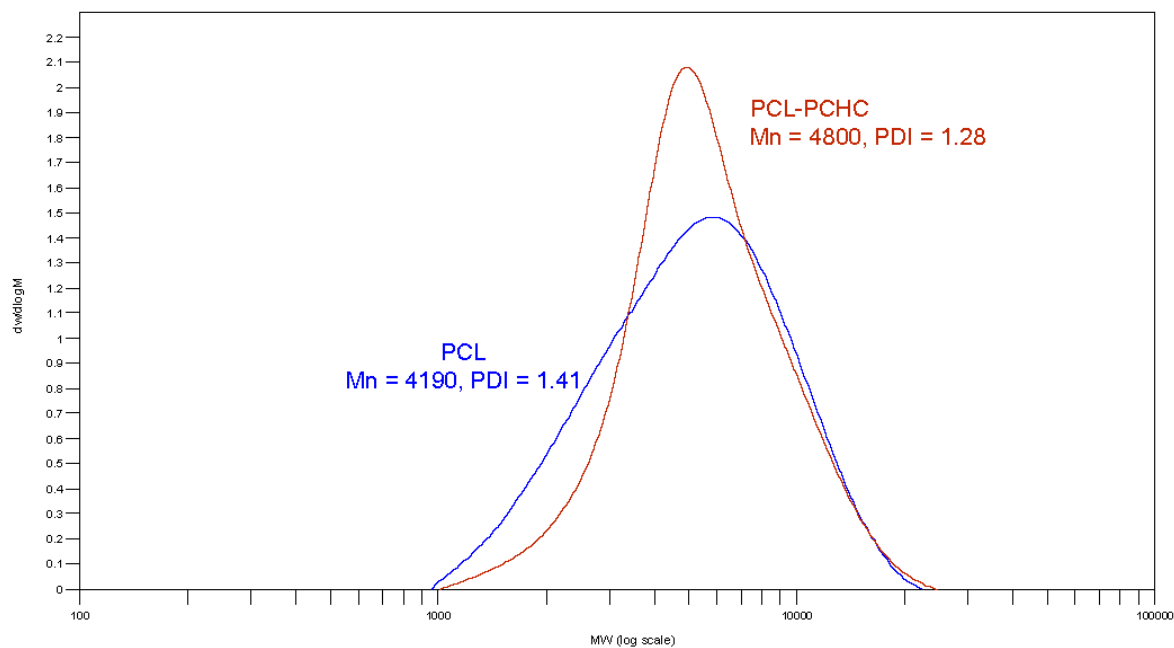

**Figure S6:** The SEC outputs from the reaction with caprolactone and epoxide, to yield of PCL (blue line), and the product PCL-PCHC, formed after addition of CO<sub>2</sub> (red line) (Table 1, run 5).

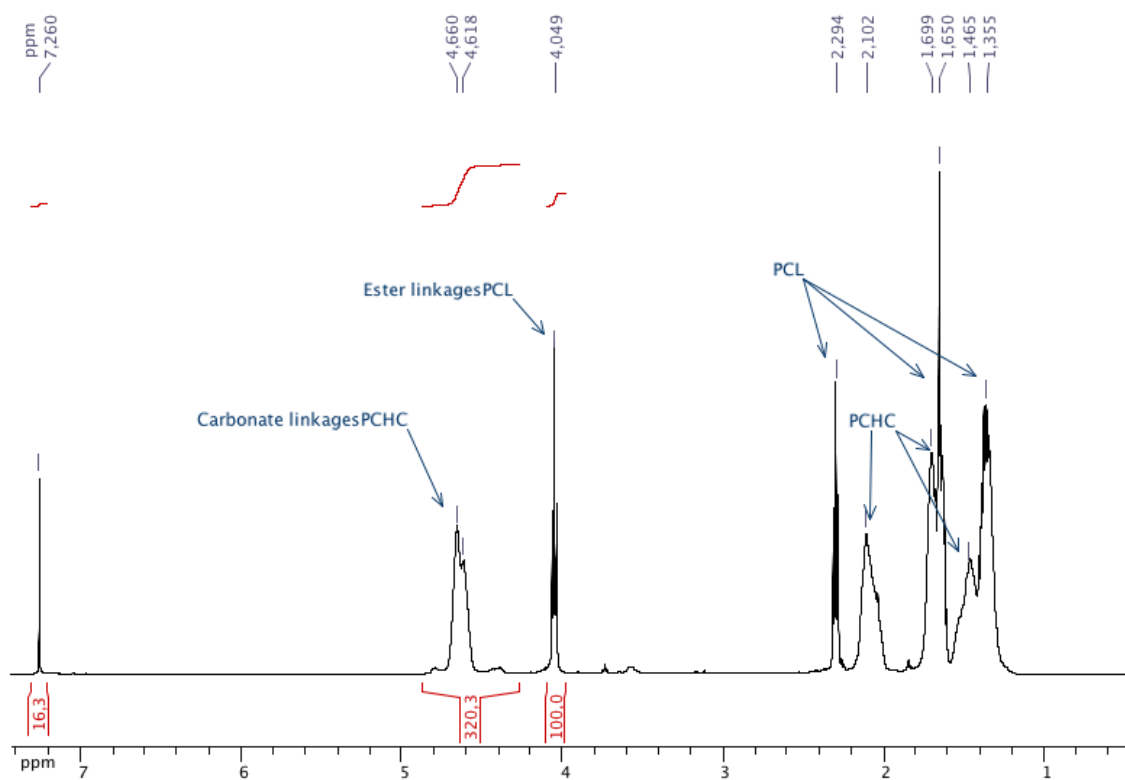

**Figure S7:** <sup>1</sup>H NMR spectrum (CDCl<sub>3</sub>, 298 K) of the PCL-PCHC copolymer formed under the conditions described in Table 1, run 5. The plot illustrates the formation of both PCHC and PCL blocks.

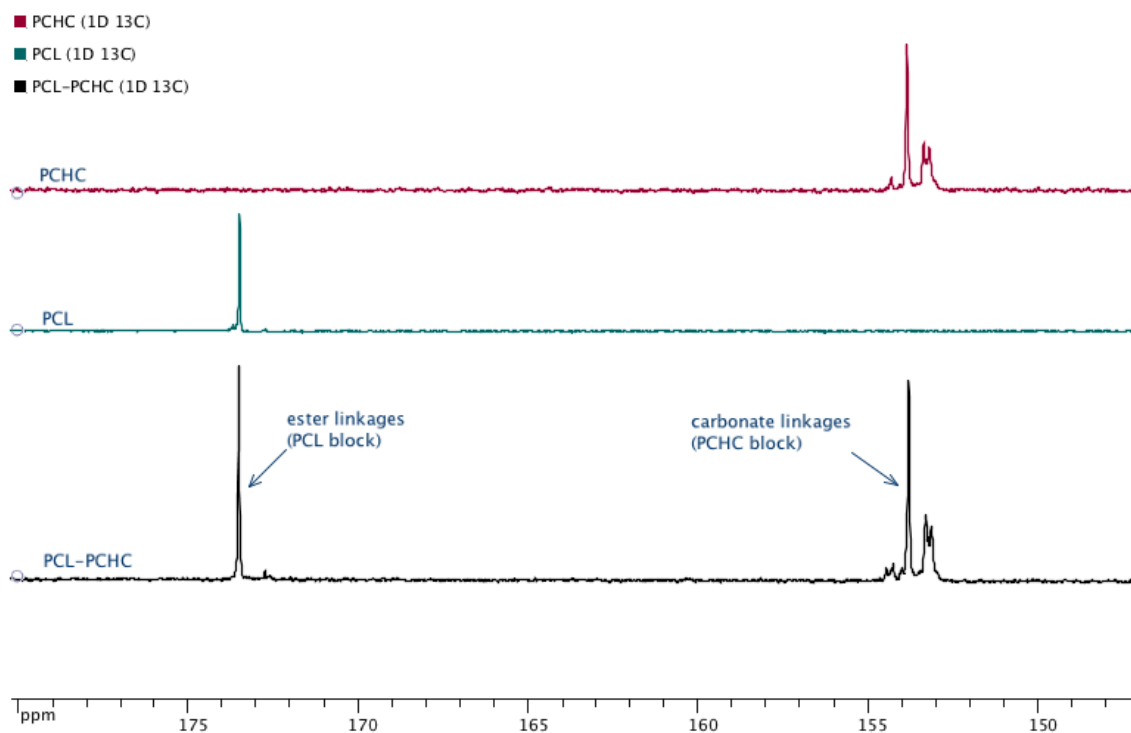

**Figure S8:** Expanded  $^{13}\text{C}\{^1\text{H}\}$  NMR spectra ( $\text{CDCl}_3$ , 298 K) for the PCL-PCHC copolymer (bottom spectrum, conditions as per Table 1, run 5) compared with pure samples of PCHC (top spectrum) and PCL (middle spectrum), respectively.

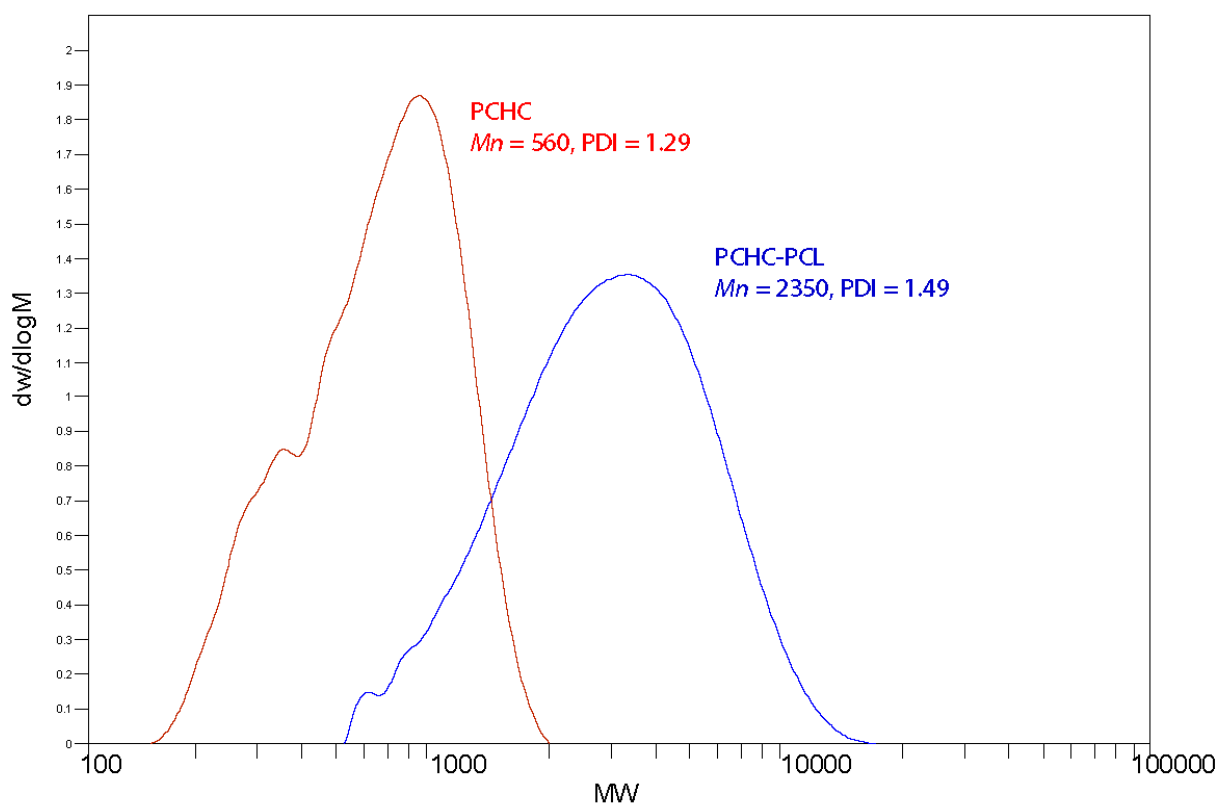

**Fig. S9:** SEC stack plot showing the analysis of PCHC-PCL formation according to the conditions of Table 1, run 7. The red trace shows the analysis of an aliquot removed after 4 h, which showed 10% CHO conversion and PCHC formation, with  $M_n$  530 g/mol. At this point, the  $\text{CO}_2$  was removed leading to CL ROP. After 2 h, a second aliquot was removed was >99% conversion of CL and formation of PCHC-PCL of  $M_n$  2350 g/mol.

<sup>i</sup> (a) M. R. Kember, P. D. Knight, P. T. R. Reung, C. K. Williams, *Angew. Chem. Int. Ed.* **2009**, *48*, 931. (b) M. R. Kember, A. J. P. White, C. K. Williams, *Inorg Chem.* **2009**, *48*, 9535 ; (c) M. Cheng, E. B. Lobkovsky, G. W. Coates, *J. Am. Chem. Soc.* **1998**, *120*, 11018-11019.

<sup>ii</sup> M. Save, M. Schappacher, A. Soum, *Macromol. Chem. Phys.* **2002**, *203*, 889-899.

<sup>iii</sup> A. Buchard, F. Jutz, M. R. Kember, A. J. P. White, H. S. Rzepa, C. K. Williams, *Macromolecules* **2012**, *45*, 6781.
